# Supplementary material for: Does Whole-Blood Neutrophil Gelatinase-Associated Lipocalin Stratify Acute Kidney Injury in Critically Ill Patients?
Source: Hindawi journal article supplement (doi:10.1155/2019/8480925), 2019-05-02
Supplement: f1 [file 8480925.f1.pdf]

**Supplemental Table 1. Diagnostic and overall accuracy of wbNGAL for AKI prediction, RRT at admission, and severe sepsis or septic shock at admission** *p*: value of statistical significance

Abbreviations: AUC area under curve of ROC analysis; CI confidence interval; AKI acute kidney injury; RRT renal replacement therapies

|                                                                  | AUC (95% CI)           | Best Cut-off<br>(ug/L) | Sensitivity<br>(%) | Specificity<br>(%) | <i>p</i> |
|------------------------------------------------------------------|------------------------|------------------------|--------------------|--------------------|----------|
| <b>AKI at admission<br/>(n=33)</b>                               | 0.859<br>(0.787-0.931) | 178                    | 82                 | 73                 | <0.0001  |
| <b>AKI development<br/>(n=43)</b>                                | 0.838<br>(0.760-0.917) | 178                    | 77                 | 79                 | <0.0001  |
| <b>AKIN 3 at admission<br/>(n=14)</b>                            | 0.833<br>(0.730-0.936) | 240                    | 79                 | 70                 | <0.0001  |
| <b>AKIN 3 development<br/>(n=18)</b>                             | 0.861<br>(0.778-0.945) | 264                    | 78                 | 75                 | <0.0001  |
| <b>RRT at admission<br/>(n=9)</b>                                | 0.720<br>(0.588-0.853) | 240                    | 67                 | 66                 | 0.030    |
| <b>Severe sepsis or septic<br/>shock at admission<br/>(n=29)</b> | 0.870<br>(0.794-0.947) | 195                    | 86                 | 78                 | <0.0001  |
